# Supplementary material for: Improving Hox Protein Classification across the Major Model Organisms
Source: PLOS journal article supplement (doi:10.1371/journal.pone.0010820), 2010-05-25
Supplement: S4 (10.1371/journal.pone.0010820.s004) [file journal.pone.0010820.s004]

# Outline of automated cluster detection via Network-clustering as implemented in CLANS

Aim of the automated clustering methods implemented in CLANS is to facilitate the selection of sequences and assigning them to groups. Displayed below is a typical cluster map.

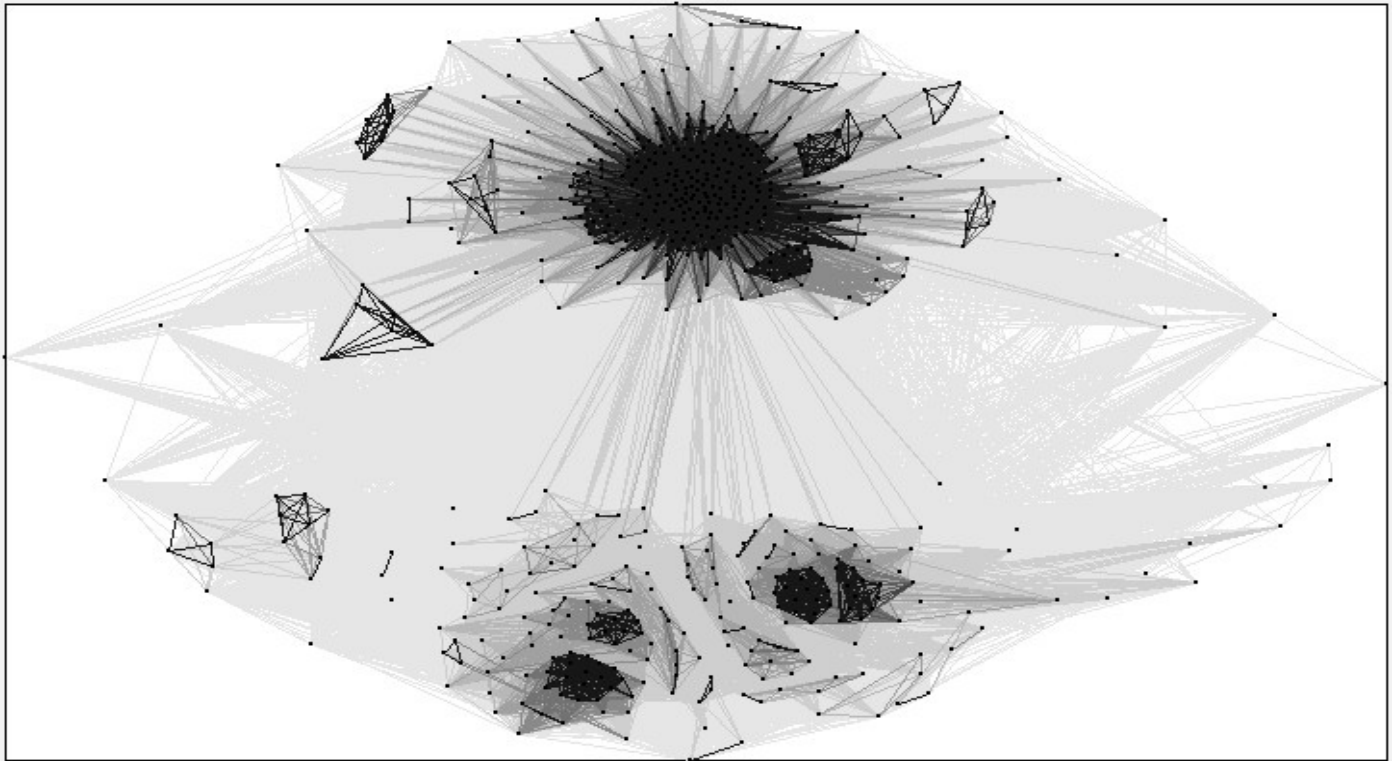

Network clustering detects 24 separate groups of sequences in this map.  
Colors are used to highlight the different groups

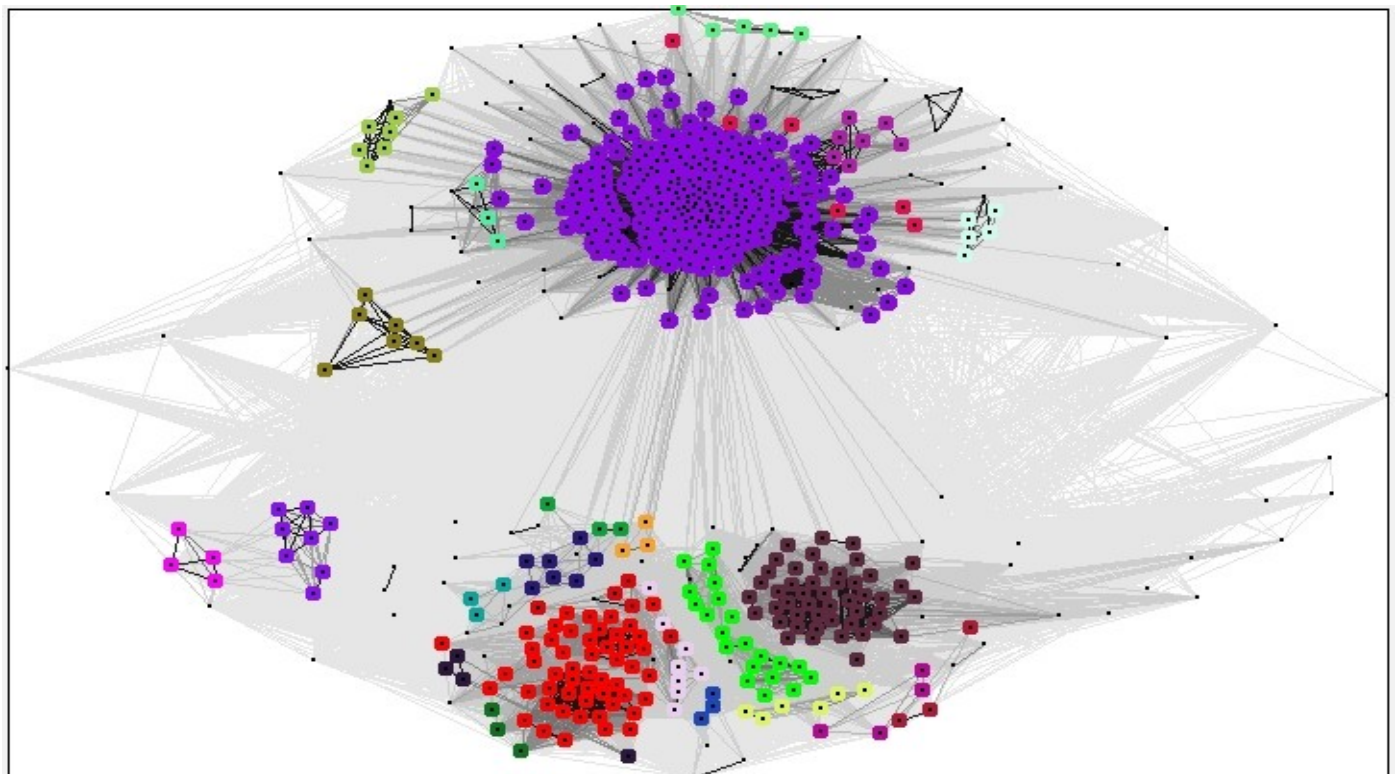

In the following, the clustering method is described using a simplified CLANS map (containing 10 sequences). The similarity values on which the map is based are, for simplicity's sake, either '0.9' (90% identity), '0.7' (70% identity) or '0' (below cutoff).

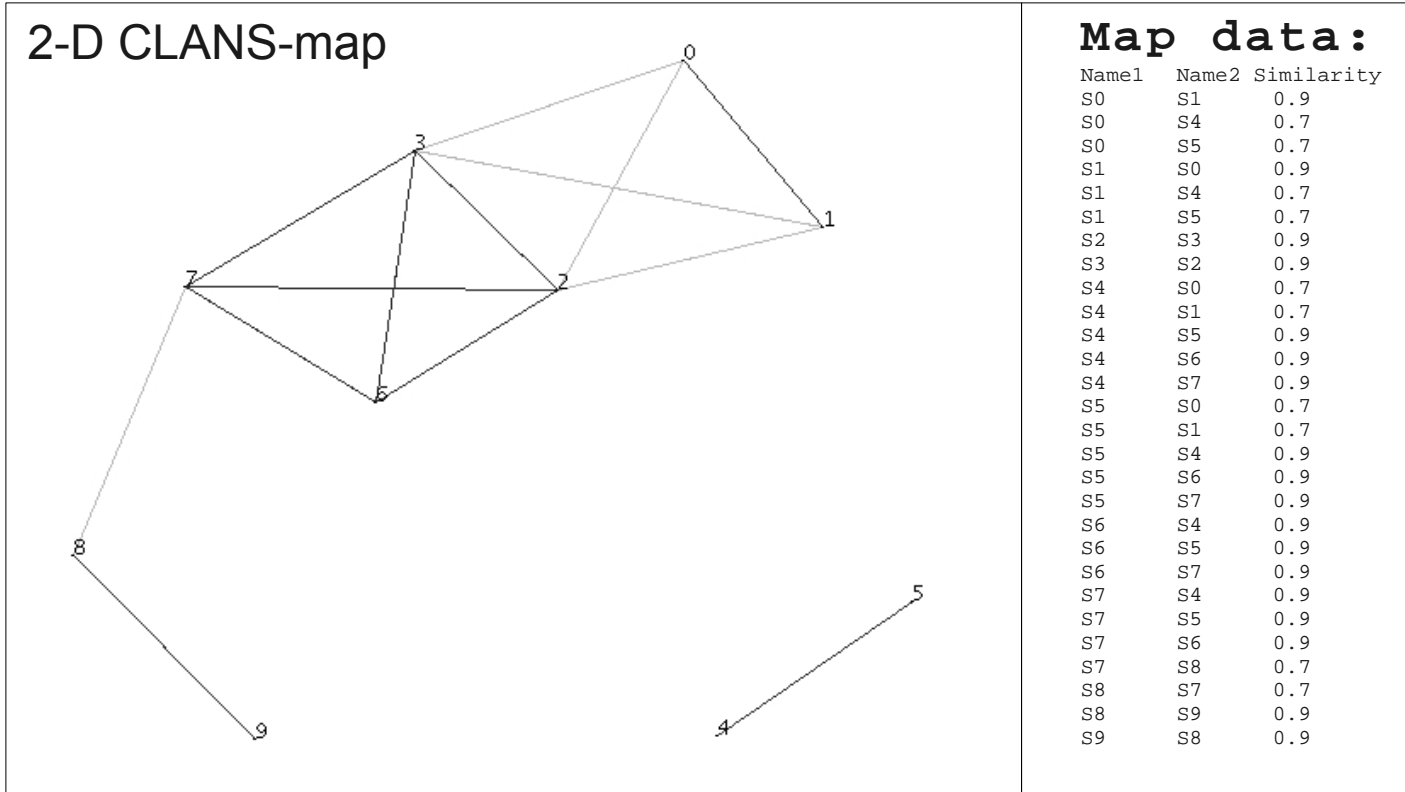

The 'Network-clustering' approach is implemented in CLANS as an iterative three-step process, but the data requires some preparation.

**Preparation:**

I) Each sequence in the CLANS map above (shown as a dots) is represented as a node/neuron in a single-layer, fully-connected neural network below. II) The connections between nodes are weighted according to the similarity values calculated for the sequence-pairs. In this example there are ten nodes (nodes 0-9) which are connected to each-other according to the above specified similarity values:'0.9' (black), '0.7' (grey) or '0' (no connection). III) Initially, each node is assumed to belong to a separate cluster: Node0 belonging to cluster-A, Node1 to cluster-B, ..., Node9 to cluster-J.

Preparation

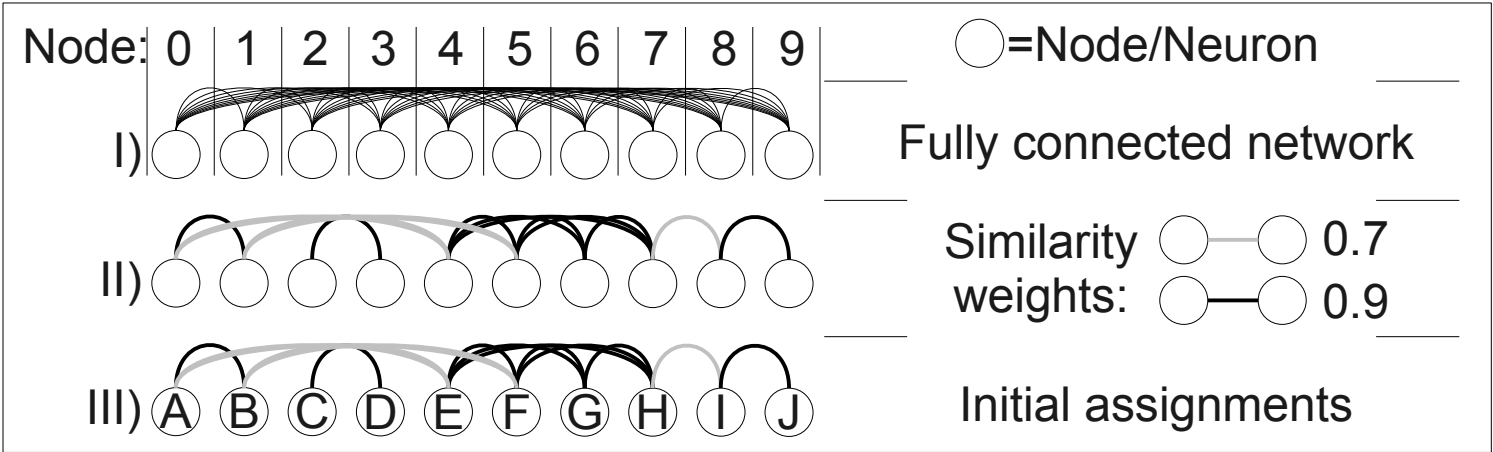



As some of the nodes changed cluster assignments, a further iteration is performed.

## Iteration 2

VI) The cluster-assignments for nodes 0-9 at the beginning of the second iteration. Assignments received by Node1 are shown. Node0 sends a cluster-A assignment with a weight of 0.9 while nodes 4 and 5 both send cluster-E assignments each with a weight of 0.7 ( $2 \times 0.7 = 1.4$ ). The cluster-E assignment weight is larger than the weight for cluster-A ( $1.4 > 0.9$ ) and this causes Node1 to now adopt a cluster-E assignment (the identical scenario applies for Node0).

VII) The resulting post-emission cluster **assignments**: Node0 and Node1 have adopted cluster-E assignments, the assignments of the other nodes remain unchanged.

No **post-processing** (see iteration 1, point 'V') is required as nodes 4 and 5 did not swap cluster-assignments with nodes 0 and 1.

## Iteration 2

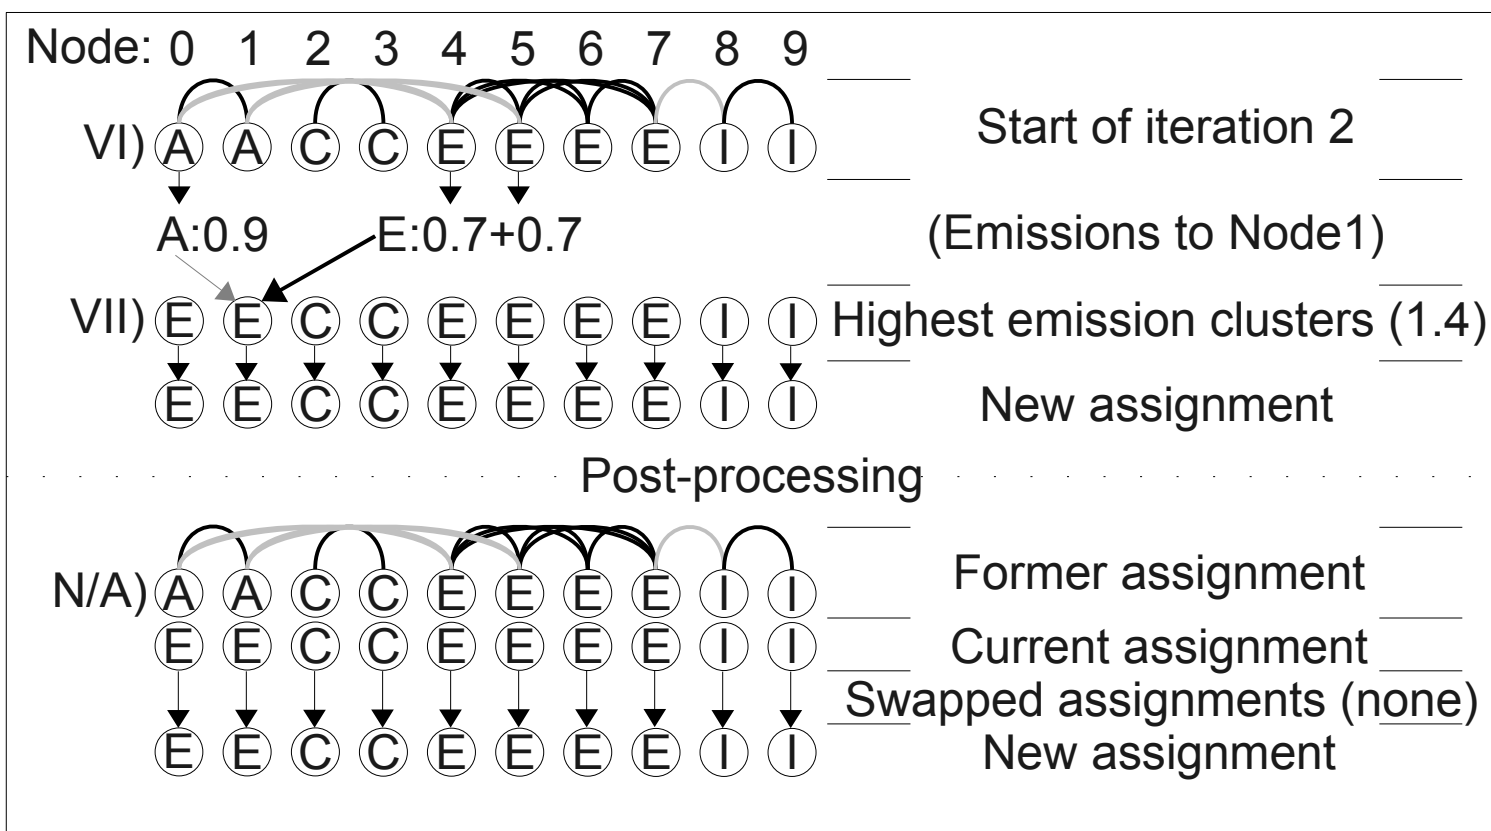

As some of the nodes changed cluster assignments, a further iteration is performed.

## Iteration 3

(final iteration; no further changes in assignment occur)

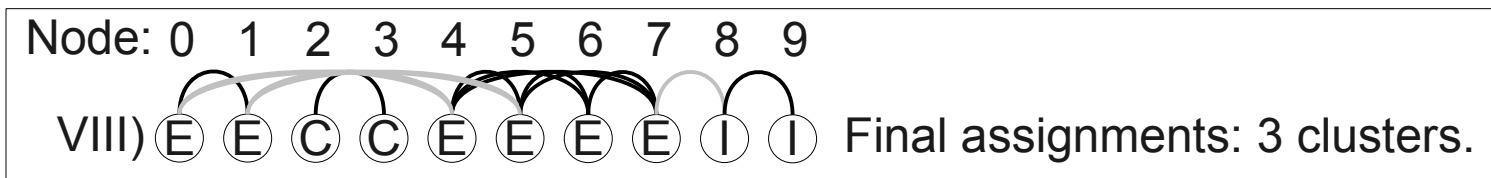

VIII) The ten nodes are assigned to three separate clusters:

Nodes: 0,1,4,5,6,7 to cluster-E.

Nodes: 2,3 to cluster-C.

Nodes: 8,9 to cluster-I.

# Overview of all steps:

## Preparation

Node: 0 1 2 3 4 5 6 7 8 9

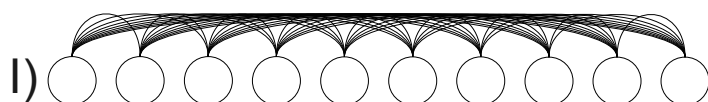

Fully connected network

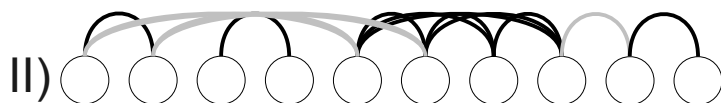

Similarity  0.7  
weights:  0.9

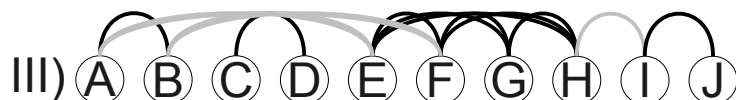

Initial assignments

## Iteration 1

Node: 0 1 2 3 4 5 6 7 8 9

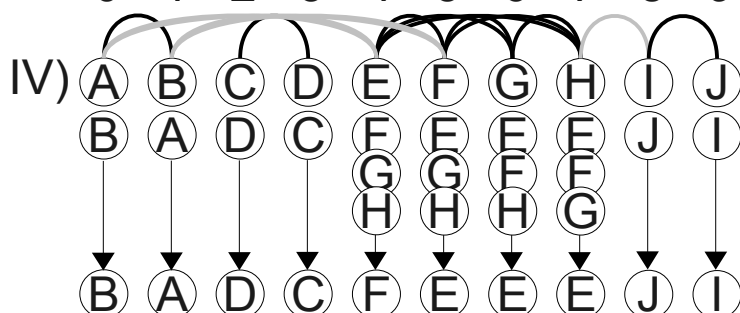

Start of iteration I

Highest emission clusters (0.9)

New assignments

## Post-processing

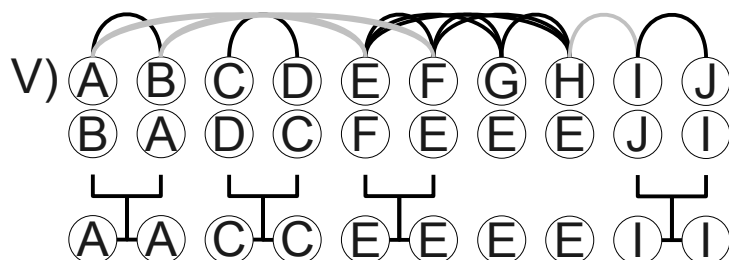

Former assignment

Current assignment

Swapped assignments

New assignment

## Iteration 2

Node: 0 1 2 3 4 5 6 7 8 9

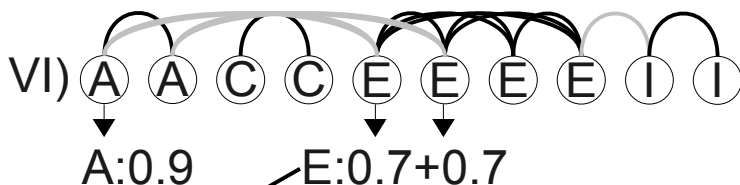

Start of iteration II

(Emissions to Node1)

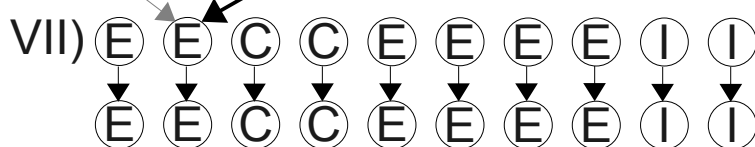

Highest emission clusters (1.4)

New assignment

## Iteration 3 and results

Node: 0 1 2 3 4 5 6 7 8 9

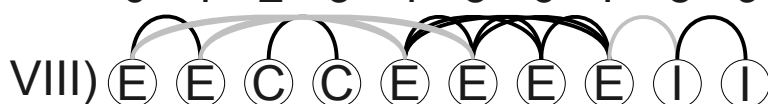

Final assignments: 3 clusters.
